# Supplementary material for: The diagnostic value of CDC20 for malignant pleural effusion of lung adenocarcinoma
Source: Research Square preprint supplement (doi:10.21203/rs.3.rs-7066819/v1), 2025-08-18
Supplement: Supplementary file 1 [file f49daadbaebda9cb350dc966.xlsx]

## Sheet: Sheet1
Table 1 Comparison of immunohistochemical results of CDC20 in the two groups
Group	n	Positive	Negative	Positive rate		x²	P
Observation group	92	85	7	0.923		146.451	<0.001
Control group	92	3	89	0.0326
Table 2 Univariate analysis of CDC20 Expression and Influencing Factors of Lung Adenocarcinoma [n (%)]
Clinical characteristics		n		CDC20 expression (%)				c²		P
				Low expression		High expression
Gender
male		39		8		31		3.801		0.051
female		53		21		32
Age (years)
>50		76		22		54		1.342		0.247
≤50		16		7		9
Lesion size (cm)
>1		77		18		59		14.515		<0.001
≤1		15		11		4
Clinical staging
I、II		91		29		62		0.465		0.495
III、IV		1		0		1
TNM staging
T1+T2		72		29		43		11.764		<0.001
T3+T4		20		0		20
N Staging
N0		87		29		58		2.434		0.119
N1		5		0		5
M Staging
M0		91		29		62		0.465		0.495
M1		1		0		1
Pleural invasion
Yes		31		1		30		17.342		<0.001
No		61		28		33
Table 3 Comparison of immunohistochemical results of CDC20 in the two groups
Group	n	Positive	Negative	Positive rate		x²	P
Observation group	30	27	3	0.9		41.713	<0.001
Control group	30	2	28	0.0667

## Sheet: Sheet2
病理号	患者姓名	性别	年龄	住院号	接收日期	TTF-1	Napsin A	临床诊断	CDC20
2000706I	潘子富	女	64	503432	2020-01-16 00:00:00	阳	部分阳	肺腺癌	0
2001219I	李泽华	男	65		2020-02-14 00:00:00	阳	阳	肺腺癌	2
2001220I	杨振兴	男	74	503224	2020-02-14 00:00:00	阳	阳	肺腺癌	2
2001994I	杨秀英	女	28	503795	2020-03-16 00:00:00	阳	阳	肺腺癌	2
2002356I	刘兴乾	男	92	499962	2020-03-25 00:00:00	阳	阳	肺腺癌	2
2002519	陈昌凤	女	51	502004	2020-03-30 00:00:00	弱阳	阳	肺腺癌	2
2002662I	赵时平	男	74	501815	2020-04-02 00:00:00	弱阳	弱阳	肺腺癌	1
2002748I	董世香	女	54	503850	2020-04-03 00:00:00	阳	阳	肺腺癌	2
2002812I	周明鸿	男	61	506262	2020-04-07 00:00:00	阳	阳	肺腺癌	2
2003160I	张俊琼	女	60	510516	2020-04-14 00:00:00	阳	阳	肺腺癌	3
2003398I	陈文志	男	74	509530	2020-04-20 00:00:00	阳	阳	肺腺癌	2
2003570I	郑国书	女	51	511913	2020-04-23 00:00:00	弱阳	弱阳	肺腺癌	1
2003713I	郭林友	男	69	511109	2020-04-27 00:00:00	部分细胞阳	阳	肺腺癌	1
2005069I	朱祥兴	男	65	510790	2020-05-22 00:00:00	阳	阳	肺腺癌	2
2005635I	陈克清	男	74	511629	2020-06-08 00:00:00	弱阳	弱阳	肺腺癌	0
2007154I	郭世英	女	79	508820	2020-06-22 00:00:00	阳	阳	肺腺癌	2
2007383I	苏正林	男	67	515638	2020-07-02 00:00:00	小灶阳	小灶阳	肺腺癌	1
2008196I	杨德宽	男	79	511823	2020-07-08 00:00:00	阳	阳	肺腺癌	1
2015872I	李光育	女	75	526840	2020-10-09 00:00:00	阳	阳	肺腺癌	1
2023419I	钟世洪	男	68	532497	2020-12-29 00:00:00	弱阳	弱阳	肺腺癌	0
32100120	杨德宽	男	80	533619	2021-02-23 00:00:00	阳	阳	肺腺癌	2
32100828I	刘才菊	女	73	541785	2021-05-31 00:00:00	阳	阳	肺腺癌	2
32101876I/T	周明鸿	男	63	551074	2021-08-17 00:00:00	阳	阳	肺腺癌	2
32101957	张秀华	女	68	556158	2021-08-30 00:00:00	阳	阳	肺腺癌	2
32102051I	袁长清	女	80	562647	2021-09-15 00:00:00	阳	阳	肺腺癌	2
32102114I	曾丰勤	女	67	563984	2021-10-08 00:00:00	阳	阳	肺腺癌	2
32102603I	肖耀珍	女	79	569404	2021-11-15 00:00:00	阳	个别弱阳	肺腺癌	1
32200330	蔡瑶芳	女	73	578211	2022-03-28 13:00:22	阳	阳	肺腺癌	2
32200444	廖兴明	男	67	585722	2022-04-26 16:04:39	阳	阳	肺腺癌	2
32200872	宋秀如	女	82	600409	2022-07-30 14:35:15	少许阳	阳	肺腺癌	1
